# Supplementary material for: MOF-derived electrochemical catalyst Cu–N/C for the enhancement of amperometric oxygen detection
Source: Royal Society of Chemistry journal article supplement (doi:10.1039/d1nr06758c), 2021-12-15
Supplement: d1nr06758c1.pdf [file d1nr06758c1.pdf]

## **MOF-derived Electrochemical Catalyst Cu-N/C for the Enhancement of the Amperometric Oxygen Detecting**

Wenyan Yin<sup>a, c</sup>, Milin Zhang<sup>a, b</sup>, Jingyuan Liu<sup>a, c, \*</sup>, Khaled Tawfik Alali<sup>a, c</sup>, Jing Yu<sup>a, c</sup>,  
Jiahui Zhu<sup>a, c</sup>, Peili Liu<sup>a</sup>, Rumin Li<sup>a</sup> and Jun Wang<sup>a, c</sup>

- a. Key Laboratory of Superlight Materials and Surface Technology, Ministry of Education, Harbin Engineering University, Harbin 150001, China
- b. College of Science, Heihe University, Heihe 164300, P.R. China
- c. College of Materials Science and Chemical Engineering, Harbin Engineering University, Harbin 150001, China

\*Corresponding authors: Jingyuan Liu

*E-mail addresses:* [liujingyuan1004@hrbeu.edu.cn](mailto:liujingyuan1004@hrbeu.edu.cn) (J. Liu).

### **Characterizations of ionic liquid [Bmmim][TFSI].**

**FTIR:** In Fig. S1, the peak observed at  $3152\text{ cm}^{-1}$  was assigned to C–H stretching vibration of the imidazole ring, and the additional peaks at  $2968\text{ cm}^{-1}$  and  $2880\text{ cm}^{-1}$  corresponded to the saturated C–H bonds of the aliphatic chain. Besides, the peaks located at  $1591\text{ cm}^{-1}$  and  $1541\text{ cm}^{-1}$  were related to the stretching vibrations of C=C bond and C=N bond on the imidazole skeleton. Adsorptions peak at  $1467\text{ cm}^{-1}$  was attributed to the bending vibration of N–CH<sub>3</sub>. Peaks at  $1351\text{ cm}^{-1}$ ,  $1192\text{ cm}^{-1}$  and  $1058\text{ cm}^{-1}$  derived from the S=O and SNS in the [TFSI], while the peaks around  $1140\text{ cm}^{-1}$  and  $741\text{ cm}^{-1}$  could be assigned to the vibrations of CF<sub>3</sub>. Peaks at lower wavenumber region ( $790\text{ cm}^{-1}$ ,  $656\text{ cm}^{-1}$ ) were indexed to the bending vibrations from C–H of imidazole ring.

**<sup>1</sup>H NMR:** Fig. S2 gave the <sup>1</sup>H NMR spectra of [Bmmim][TFSI], in which the characteristic chemical shifts ( $\delta$ ) were provided. The chemical shifts at 7.61, 7.58 were assigned to the hydrogen of carbon 1 and 2 from the imidazole ring. The chemical shifts at 4.06~4.10 were attributed to the hydrogen atoms of methylene on carbon 3. The hydrogen atoms of methyl on carbon 4 were corresponded to the chemical shift at 3.72, while the hydrogen atoms of carbon 5 corresponded to the chemical shift at 2.56. The chemical shift intervals of 1.70~1.63, 1.22~1.31, 0.87~0.90 were ascribed to methylene on carbon 6, 7 and methyl on carbon 8, respectively.

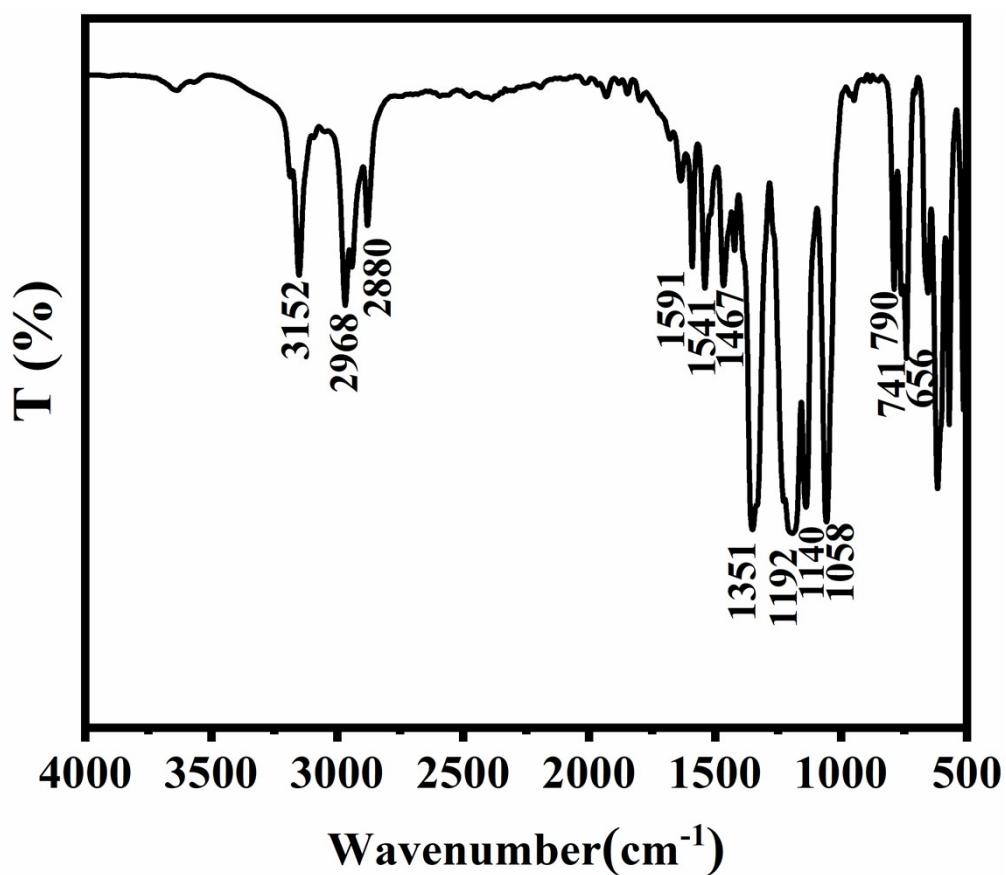

Fig. S1 FT-IR spectra of [Bmmim][TFSI].

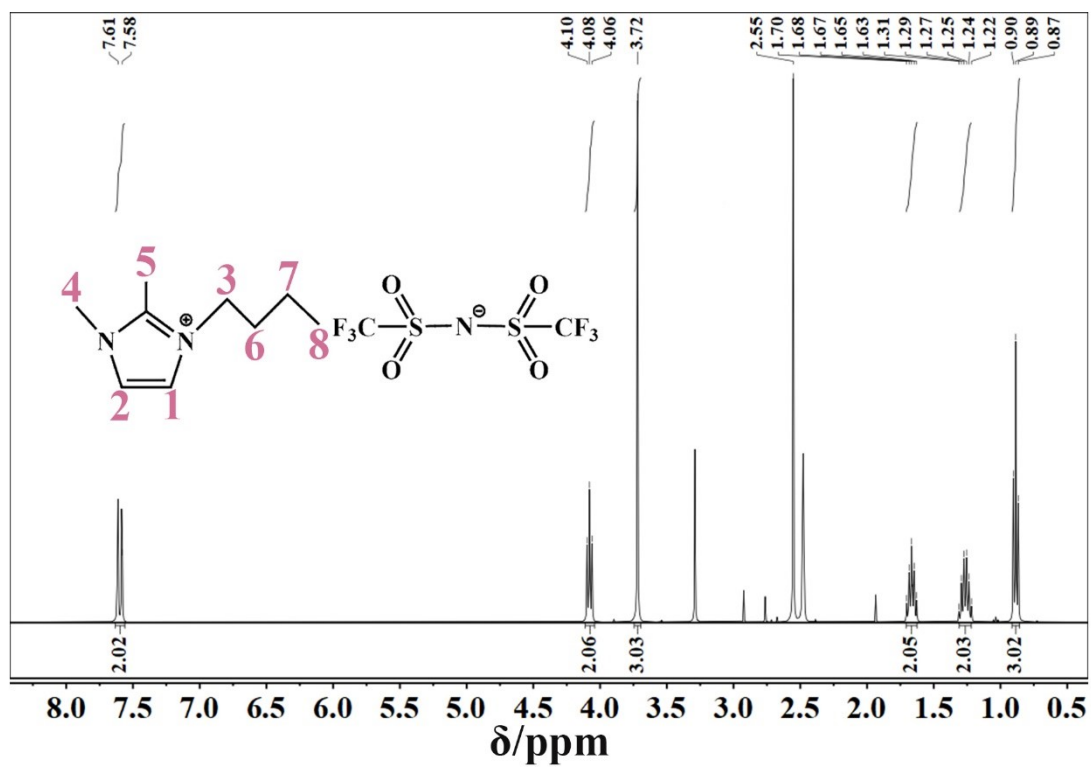

Fig. S2 <sup>1</sup>H NMR spectra of [Bmmim][TFSI].

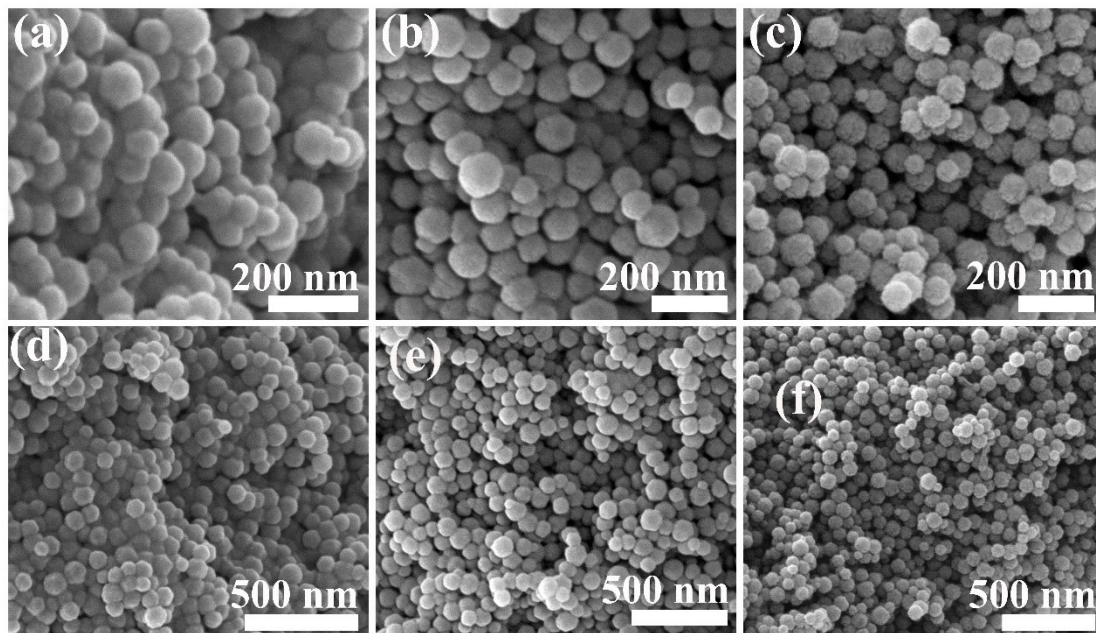

**Fig. S3** Secondary electron SEM images of Cu-N/C-700 (a, d), Cu-N/C-800 (b, e) and Cu-N/C-900 (c, f).

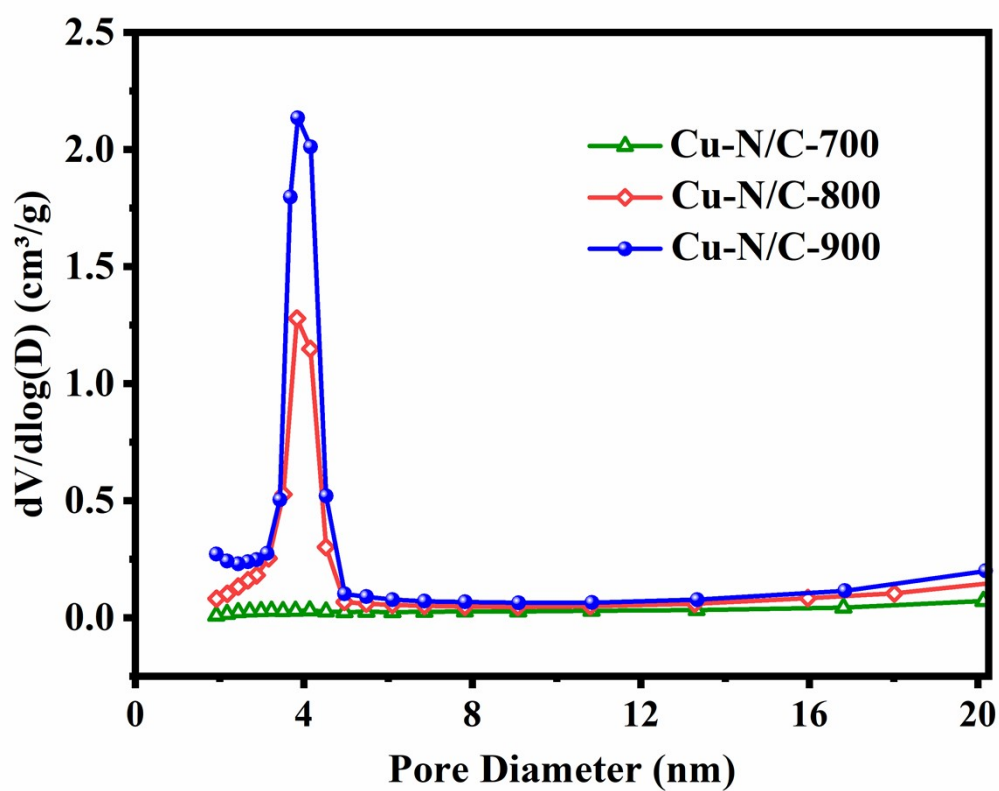

**Fig. S4** Pore size distribution of Cu-N/C-700, Cu-N/C-800 and Cu-N/C-900.

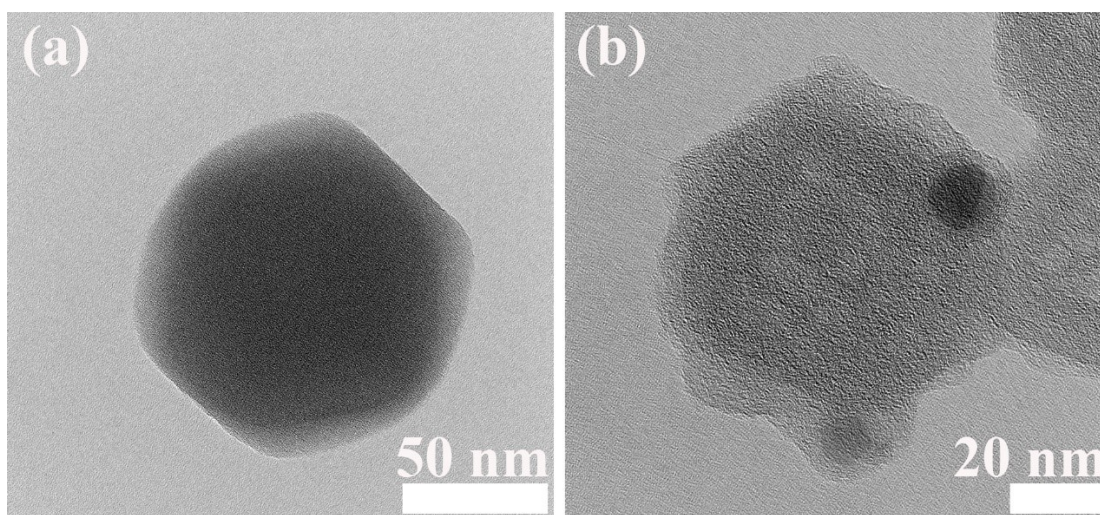

**Fig. S5** Bright field TEM images of an individual particle of Cu-ZIF-8 and Cu-N/C-900.

**Tab. S1** The percentage (%) for each element of Cu-ZIF-8, Cu-N/C-700, Cu-N/C-800 and Cu-N/C-900 from XPS.

| Elements  | Cu-N/C-900 | Cu-N/C-800 | Cu-N/C-700 | Cu-ZIF-8 |
|-----------|------------|------------|------------|----------|
| <b>Zn</b> | -          | 3          | 4.19       | 11.73    |
| <b>Cu</b> | 0.8        | 0.57       | 0.6        | 0.56     |
| <b>N</b>  | 6.41       | 14.86      | 20.92      | 16.82    |
| <b>O</b>  | 12.13      | 10.94      | 9.29       | 16.16    |
| <b>C</b>  | 80.66      | 70.63      | 65         | 54.72    |

**Tab. S2** Zn content (wt%) in different samples from ICP analysis

| Sample            | Zn content (wt%) |
|-------------------|------------------|
| <b>Cu-N/C-700</b> | 8.29             |
| <b>Cu-N/C-800</b> | 4.66             |
| <b>Cu-N/C-900</b> | 0.10             |

**Tab. S3** Comparison of the sensing performance of the as-assembled sensor unit and O<sub>2</sub> sensor reported in literatures.

| Sensors (IL adopted)                                                                    | Target sensing gas | Concentration range (v/v%)     | Sensitivity                         | LOD            | reference        |
|-----------------------------------------------------------------------------------------|--------------------|--------------------------------|-------------------------------------|----------------|------------------|
| Porous polyethylene membrane (EMIBF <sub>4</sub> )                                      | O <sub>2</sub>     | 0~100 % (v/v%)                 | 0.0067 μA/O <sub>2</sub> %          | unprovided     | 1                |
| Planar permeable membrane [C <sub>4</sub> mpy][NTf <sub>2</sub> ]                       | O <sub>2</sub>     | 0~21 % (v/v%)                  | 0.48 μA/%                           | 0.08 vol %     | 2                |
| Microdisc electrode [P <sub>6,6,6,14</sub> ][FAP]                                       | O <sub>2</sub>     | 0.77~1.00 bar                  | 9.8 nA/bar <sup>-1</sup>            | unprovided     | 3                |
| [BMIM][NTf <sub>2</sub> ]                                                               | O <sub>2</sub>     | 200~10 <sup>6</sup> ppm<br>v/v | 660 μA ppm <sup>-1</sup><br>v/v     | 140 ppm<br>v/v | 4                |
| IL-NiCo <sub>2</sub> O <sub>4</sub> /rGO composite electrolyte [BMIM][PF <sub>6</sub> ] | O <sub>2</sub>     | 0~100 % (v/v%)                 | 0.1087 μA/O <sub>2</sub> %<br>(v/v) | unprovided     | 5                |
| Double-layer ionic liquid film [BMIM][BF <sub>4</sub> ]                                 | O <sub>2</sub>     | 0~100 % (v/v%)                 | 0.077 μA/O <sub>2</sub> %           | unprovided     | 6                |
| This work                                                                               | O <sub>2</sub>     | 0~100 % (v/v%)                 | 0.1678 μA/O <sub>2</sub> %          | 0.42 vol %     | <b>This work</b> |

1. R. Wang, T. Okajima, F. Kitamura and T. Ohsaka, *Electroanalysis*, 2004, **16**, 66-72.
2. X. Y. Mu, Z. Wang, X. Q. Zeng and A. J. Mason, *IEEE Sens. J.*, 2013, **13**, 3976-3981.
3. P. L. Li and R. G. Compton, *Electroanalysis*, 2015, **27**, 1550-1555.
4. R. Toniolo, N. Dossi, A. Pizzariello, A. P. Doherty, S. Susmel and G. Bontempelli, *J. Electroanal. Chem.*, 2012, **670**, 23-29.
5. L. Yu, J. Liu, W. Yin, J. Yu, R. Chen, D. Song, Q. Liu, R. Li and J. Wang, *Talanta*, 2020, **209**.
6. H. Zhang, J. Liu, Q. Liu, R. Chen, H. Zhang, J. Yu, D. Song, X. Jing, M. Zhang and J. Wang, *J. Electrochem. Soc.*, 2018, **165**, B779-B786.

**Tab. S4** The fitted EIS parameters from the equivalent circuits for the pure ionic liquid, and composites electrolytes (with different Cu-N/C content).

| Electrolyte              | R <sub>ct</sub> (Ω) | W (Ω)                  |
|--------------------------|---------------------|------------------------|
| [Bmmim][TFSI]            | 485.0               | 1.45*10 <sup>5</sup>   |
| [Bmmim][TFSI]-2 % Cu-N/C | 427.6               | 1.32*10 <sup>-8</sup>  |
| [Bmmim][TFSI]-4 % Cu-N/C | 420.3               | 8.30*10 <sup>-17</sup> |
| [Bmmim][TFSI]-6 % Cu-N/C | 404.7               | 3.02*10 <sup>-8</sup>  |
| [Bmmim][TFSI]-8 % Cu-N/C | 778.1               | 1.45*10 <sup>5</sup>   |
